# Supplementary material for: Pt current collectors artificially boosting praseodymium doped ceria oxygen surface exchange coefficients
Source: Royal Society of Chemistry journal article supplement (doi:10.1039/d1ta06237a), 2021-01-01
Supplement: d1ta06237a1.xlsx [file d1ta06237a1.xlsx]

## Sheet: LSF,Mosleh (Electrochem)
Avagodros Number		Boltzmann Constant		Faraday Constant			Study Reference
6.022e+23	mol-1	1.38e-23	J*K-1	96485.3	C*mol-1		A
Kchem							Primary Citation
Temperature (K)	Temperature (°C)	Log(Kchem) (cm/s)	Kchem (cm/s)				Mosleh, J. Electrochem. Soc., “Kinetics and Mechanisms of Oxygen Surface Exchange on LSF Thin Films”, 156, (4), (2009), B441
1073.15	800	-5.47	3.38844e-06
1048.22	775.068	-6.17	6.76083e-07				Additional Data Reference Citations
1023.65	750.496	-6.71	1.94984e-07			1	Sogaard, J. Solid State Chemistry, “Oxygen Nonstoichiometry and Transport Properties of Strontium Substituted Lanthanum Ferrite”, 180, (2007), 1489
998.403	725.253	-7.27	5.37032e-08
947.733	674.583	-8.29	5.12861e-09
							NOTE
Ko							Kchem, Ko and Rs Value Colors Indicate the following:
Temperature (K)	Temperature (°C)		Ko (cm/s)				Yam, Green, Purple	Values were taken directly from this current citation without calculations
1073.15	800		3.37118e-08				Dark Grey	Values were derived within the primary citation or was calculated here using other parameters within the primary citation
1048.22	775.068		5.82607e-09				Light Grey	Values were calculated using parameters taken from other literature citations
1023.65	750.496		1.49756e-09
998.403	725.253		3.52337e-10
947.733	674.583		2.40849e-11
Rs
Temperature (K)	Temperature (°C)	Co (mol*cm-3) From Additional Reference (1)	Rs (Ω* cm2)
1073.15	800	0.0798319	88.9895
1048.22	775.068	0.0816464	491.786
1023.65	750.496	0.0795267	1918.18
998.403	725.253	0.0774101	8169.33
947.733	674.583	0.0731865	119991
Additional Reference Data from Primary Citation
Temperature (K)	Temperature (°C)	Oxygen Nonstoichiometry		Temperature (K)	Temperature (°C)	Log (Vacancy Thermodynamic Factor)	Vacancy Thermodynamic Factor	Oxygen Thermodynamic Factor
1073.15	800	0.043155		1073.15	800	0.16642	1.46697	100.512
1048.15	775	0.0359633		1048.15	775	0.1486	1.40799	116.044
1023.15	750	0.0292844		1023.15	750	0.10839	1.28348	130.201
998.15	725	0.023889		998.15	725	0.08759	1.22346	152.42
973.15	700	0.018238		973.15	700	0.06788	1.16918	191.151
948.15	675	0.0155144		948.15	675		1.10693	212.939
923.15	650	0.0123302		923.15	650	0.04598	1.11168	269.366
898.15	625	0.0101428		898.15	625		1.00661	695.58
873.15	600	0.0082011		873.15	600		0.959918	820.59
823.15	550	0.00536163		823.15	550		0.872923	923.109
798.15	525	0.0043352		798.15	525		0.832429	575.216
773.15	500	0.00350527		773.15	500		0.793813	678.594
748.15	475	0.00283422		748.15	475		0.756988	800.508

## Sheet: LSF,Sogaard (Electroceram)
Avagodros Number		Boltzmann Constant		Faraday Constant			Study Reference
6.022e+23	mol-1	1.38e-23	J*K-1	96485.3	C*mol-1		B
Kchem							Primary Citation
Temperature (K)	Temperature (°C)	Log(Kchem) (cm/s)	Kchem (cm/s)				Sogaard, J. Electroceram, “Oxygen Incorporation in Porous Thin Films of Strontium doped Lanthanum Ferrite”, 27, (2011), 134
923.15	650	-5.7649	1.7183e-06
873.15	600	-6.2455	5.68198e-07				Additional Data Reference Citations
823.15	550	-7.4357	3.66691e-08			1	Sogaard, J. Solid State Chemistry, “Oxygen Nonstoichiometry and Transport Properties of Strontium Substituted Lanthanum Ferrite”, 180, (2007), 1489
						2	Mosleh, J. Electrochem. Soc., “Kinetics and Mechanisms of Oxygen Surface Exchange on LSF Thin Films”, 156, (4), (2009), B441
Ko							NOTE
Temperature (K)	Temperature (°C)	Oxygen Thermodynamic Factor From Additional Reference (2)	Ko (cm/s)				Kchem, Ko and Rs Value Colors Indicate the following:
923.15	650	269.366	6.37907e-09				Yam, Green, Purple	Values were taken directly from this current citation without calculations
873.15	600	820.59	6.92427e-10				Dark Grey	Values were derived within the primary citation or was calculated here using other parameters within the primary citation
823.15	550	923.109	3.97235e-11				Light Grey	Values were calculated using parameters taken from other literature citations
Rs
Temperature (K)	Temperature (°C)	Co (mol*cm-3) From Additional Reference (1)	Oxygen Thermodynamic Factor From Additional Reference (2)	Rs (Ω* cm2)
923.15	650	0.0710795	269.366	454.368
873.15	600	0.0668754	820.59	4208.1
823.15	550	0.0626849	923.109	73774.5

## Sheet: LSF,Sogaard (Solid State Chem)
Avagodros Number		Boltzmann Constant		Faraday Constant			Study Reference
6.022e+23	mol-1	1.38e-23	J*K-1	96485.3	C*mol-1		C
Kchem							Primary Citation
Temperature (K)	Temperature (°C)	Log(Kchem) (cm/s)	Kchem (cm/s)				Sogaard, J. Solid State Chemistry, “Oxygen Nonstoichiometry and Transport Properties of Strontium Substituted Lanthanum Ferrite”, 180, (2007), 1489
1273.15	1000	-1	0.1
1223.15	950	-1.817	0.0152405
1173.15	900	-2.525	0.00298538
1123.15	850	-2.649	0.00224388
1073.15	800	-3.303	0.000497737
1023.15	750	-3.3579	0.000438632				NOTE
973.15	700	-4.455	3.50752e-05				Kchem, Ko and Rs Value Colors Indicate the following:
							Yam, Green, Purple	Values were taken directly from this current citation without calculations
Ko							Dark Grey	Values were derived within the primary citation or was calculated here using other parameters within the primary citation
Temperature (K)	Temperature (°C)		Ko (cm/s)				Light Grey	Values were calculated using parameters taken from other literature citations
1273.15	1000		0.000803526
1223.15	950		0.000121865
1173.15	900		2.0893e-05
1123.15	850		1.3356e-05
1073.15	800		2.22331e-06
1023.15	750		1.87289e-06
973.15	700		1.24707e-07
Rs
Temperature (K)	Temperature (°C)		Rs (Ω* cm2)
1273.15	1000		0.00886751
1223.15	950		0.0534147
1173.15	900		0.284824
1123.15	850		0.407452
1073.15	800		2.23829
1023.15	750		2.42883
973.15	700		32.0455
Additional Reference Data from Primary Citation
Temperature (K)	Temperature (°C)	Oxygen Ion Conductivity (S*cm-1)	Do (cm2)	Co (mol*cm-3)		Temperature (K)	Temperature (°C)	Log(Thermodynamic Factor)	Thermodynamic Factor
1273.15	1000	0.21	6.2e-07	0.0962375		1273.14	1000	2.095	124.451
1223.15	950	0.102102	2.88618e-07	0.0965671		1223.14	950		125.061
1173.15	900	0.049	1.5e-07	0.0855255		1173.14	900	2.155	142.889
1148.15	875	0.0366936	1.04288e-07	0.0901552		1123.14	850		168.005
1123.15	850	0.0255818	7.28463e-08	0.0880236		1073.14	800	2.35	223.872
1073.15	800	0.013	3.9e-08	0.0798319		1023.14	750		234.2
1048.15	775	0.00810425	2.32186e-08	0.0816464		973.14	700		281.261
1023.15	750	0.00538896	1.54728e-08	0.0795267		948.14	675		309.762
998.15	725	0.00353418	1.01701e-08	0.0774101		923.14	650		342.395
973.15	700	0.00228372	6.58694e-09	0.0752967		898.14	625		379.957
948.15	675	0.00145244	4.19935e-09	0.0731865		873.14	600		423.435
923.15	650	0.000908106	2.63209e-09	0.0710795		848.14	575		474.069
873.15	600	0.000335395	9.77274e-10	0.0668754		823.14	550		533.43
848.15	575	0.000197492	5.7707e-10	0.0647784		798.14	525		603.528
823.15	550	0.000113584	3.32866e-10	0.0626849		773.14	500		686.963
798.15	525	6.36656e-05	1.87151e-10	0.0605947		748.14	475		787.146
773.15	500	3.46917e-05	1.02308e-10	0.058508		648.14	375		1474.08
748.15	475	1.83239e-05	5.42217e-11	0.0564248		623.14	350		1770.29
723.15	450	9.35016e-06	2.77667e-11	0.0543451		598.14	325		2155.07
673.15	400	2.15912e-06	6.46188e-12	0.0501958		573.14	300		2665.14
648.15	375	9.67136e-07	2.90683e-12	0.0481262		548.14	275		3357.46
623.15	350	4.0985e-07	1.23747e-12	0.0460597
598.15	325	1.62974e-07	4.94484e-13	0.0439961
573.15	300	6.01921e-08	1.83598e-13	0.0419351
548.15	275	2.03844e-08	6.25346e-14	0.0398763

## Sheet: LSF,Yang (Solid State Ionics)
Avagodros Number		Boltzmann Constant		Faraday Constant			Study Reference
6.022e+23	mol-1	1.38e-23	J*K-1	96485.3	C*mol-1		D
Kchem							Primary Citation
Temperature (K)	Temperature (°C)		Kchem (cm/s)				Yang, Solid State Ionics, “In-situ Oxygen Surface Exchange Coefficient Measurements on Lanthanum Strontium Ferrite Thin Films via the Curvature Relaxation Method”, 249, (2013), 123
797.926	524.776		1.0404e-06
772.669	499.519		4.703e-07				Additional Data Reference Citations
747.985	474.835		1.7433e-07			1	Sogaard, J. Solid State Chemistry, “Oxygen Nonstoichiometry and Transport Properties of Strontium Substituted Lanthanum Ferrite”, 180, (2007), 1489
Ko
Temperature (K)	Temperature (°C)	Oxygen Thermodynamic Factor From Additional Reference (1)	Ko (cm/s)				NOTE
797.926	524.776	603.528	1.72386e-09				Kchem, Ko and Rs Value Colors Indicate the following:
772.669	499.519	686.963	6.84607e-10				Yam, Green, Purple	Values were taken directly from this current citation without calculations
747.985	474.835	787.146	2.21471e-10				Dark Grey	Values were derived within the primary citation or was calculated here using other parameters within the primary citation
							Light Grey	Values were calculated using parameters taken from other literature citations
Rs
Temperature (K)	Temperature (°C)	Co (mol*cm-3) From Additional Reference (1)	Rs (Ω* cm2)
797.926	524.776	0.0605947	1704.76
772.669	499.519	0.058508	4305.01
747.985	474.835	0.0564248	13358

## Sheet: LSF,ten Elshof (Electrochem)
Avagodros Number		Boltzmann Constant		Faraday Constant			Study Reference
6.022e+23	mol-1	1.38e-23	J*K-1	96485.3	C*mol-1		E
Kchem							Primary Citation
Temperature (K)	Temperature (°C)	Log(Kchem) (cm/s)	Kchem (cm/s)				Ten Elshof, J. Electrochem. Soc., “Oxygen Exchange and Diffusion Coefficients of Strontium-Doped Lanthanum Ferrites by Electrical Conductivity Relaxation”, 144, (3), (1997), 1060
1223.15	950	-2.1355	0.00731981
1148.15	875	-2.39066	0.00406762				Additional Data Reference Citations
1073.15	800	-2.8735	0.00133814			1	Sogaard, J. Solid State Chemistry, “Oxygen Nonstoichiometry and Transport Properties of Strontium Substituted Lanthanum Ferrite”, 180, (2007), 1489
998.15	725	-3.5022	0.00031463
923.15	650	-3.894	0.000127644
							NOTE
Ko							Kchem, Ko and Rs Value Colors Indicate the following:
Temperature (K)	Temperature (°C)	Log(Ko) (cm/s)	Ko (cm/s)				Yam, Green, Purple	Values were taken directly from this current citation without calculations
1223.15	950	-4.2046	6.2431e-05				Dark Grey	Values were derived within the primary citation or was calculated here using other parameters within the primary citation
1148.15	875	-4.584	2.60615e-05				Light Grey	Values were calculated using parameters taken from other literature citations
1073.15	800	-5.0526	8.85931e-06
1048.15	775		4.68858e-06
1023.15	750		3.01544e-06
998.15	725	-5.608	2.46604e-06
948.15	675		7.30145e-07
923.15	650	-6.446	3.58096e-07
Rs
Temperature (K)	Temperature (°C)	Co (mol*cm-3) From Additional Reference (1)	Rs (Ω* cm2)
1223.15	950	0.0965671	0.0452781
1148.15	875	0.0901552	0.109055
1073.15	800	0.0798319	0.338627
998.15	725	0.0774101	1.1669
923.15	650	0.0710795	8.09404
Additional Reference Data from Primary Citation
Temperature (K)	Temperature (°C)	Oxygen Thermodynamic Factor
1223.15	950	117.247
1148.15	875	156.077
1073.15	800	151.043
998.15	725	127.585
923.15	650	356.451

## Sheet: LSF,Armstrong (Phys Chem)
Avagodros Number		Boltzmann Constant		Faraday Constant			Study Reference
6.022e+23	mol-1	1.38e-23	J*K-1	96485.3	C*mol-1		F
Kchem							Primary Citation
Temperature (K)	Temperature (°C)	Oxygen Thermodynamic Factor From Additional Reference (1)	Kchem (cm/s)				Armstrong, Phys. Chem. Chem. Phys., “Effect of A and B-Site Cations on Surface Exchange Coefficient for ABO3 Perovskite Materials”, 15, (2013), 2298
1123.15	850	168.005	5.19135e-06
1073.15	800	223.872	7.09675e-06				Additional Data Reference Citations
1023.15	750	234.2	7.09627e-06			1	Sogaard, J. Solid State Chemistry, “Oxygen Nonstoichiometry and Transport Properties of Strontium Substituted Lanthanum Ferrite”, 180, (2007), 1489
973.15	700	281.261	7.84719e-06
Ko							NOTE
Temperature (K)	Temperature (°C)		Ko (cm/s)				Kchem, Ko and Rs Value Colors Indicate the following:
1123.15	850		3.09e-08				Yam, Green, Purple	Values were taken directly from this current citation without calculations
1073.15	800		3.17e-08				Dark Grey	Values were derived within the primary citation or was calculated here using other parameters within the primary citation
1023.15	750		3.03e-08				Light Grey	Values were calculated using parameters taken from other literature citations
973.15	700		2.79e-08
Rs
Temperature (K)	Temperature (°C)	Co (mol*cm-3) From Additional Reference (1)	Rs (Ω* cm2)
1123.15	850	0.0880236	92.1547
1073.15	800	0.0798319	94.6372
1023.15	750	0.0795267	94.7591
973.15	700	0.0752967	103.38
Additional Reference Data from Primary Citation
Temperature (K)	Temperature (°C)	Conductivity (S*cm-1)	Do (cm2) From Additional Reference (1)	Co (mol*cm-3)
1173.15	900	0.23	1.5e-07	0.401446
1123.15	850	0.19	7.28463e-08	0.653764
1073.15	800	0.15	3.9e-08	0.921137
1023.15	750	0.11	1.54728e-08	1.62331

## Sheet: LSF,Ishigaki (Solid State Chem)
Avagodros Number		Boltzmann Constant		Faraday Constant			Study Reference
6.022e+23	mol-1	1.38e-23	J*K-1	96485.3	C*mol-1		G
Kchem							Primary Citation
Temperature (K)	Temperature (°C)	Oxygen Thermodynamic Factor From Additional Reference (1)	Kchem (cm/s)				Ishigaki, J. Solid State Chemistry, “Diffusion of Oxide Ion Vacancies in Perovskite-Type Oxides”, 73, (1988), 179
1273.15	1000	124.451	0.00150586
							Additional Data Reference Citations
						1	Sogaard, J. Solid State Chemistry, “Oxygen Nonstoichiometry and Transport Properties of Strontium Substituted Lanthanum Ferrite”, 180, (2007), 1489
Ko
Temperature (K)	Temperature (°C)		Ko (cm/s)
1273.15	1000		1.21e-05				NOTE
							Kchem, Ko and Rs Value Colors Indicate the following:
Rs							Yam, Green, Purple	Values were taken directly from this current citation without calculations
Temperature (K)	Temperature (°C)	Co (mol*cm-3) From Additional Reference (1)	Rs (Ω* cm2)				Dark Grey	Values were derived within the primary citation or was calculated here using other parameters within the primary citation
1273.15	1000	0.0962375	0.243998				Light Grey	Values were calculated using parameters taken from other literature citations

## Sheet: LSF,Baumann (Electrochem)
Avagodros Number		Boltzmann Constant		Faraday Constant			Study Reference
6.022e+23	mol-1	1.38e-23	J*K-1	96485.3	C*mol-1		H
Kchem							Primary Citation
Temperature (K)	Temperature (°C)	Oxygen Thermodynamic Factor From Additional Reference (1)	Kchem (cm/s)				Baumann, J. Electrochem. Soc., “Quantitative Comparison of Mixed Conducting SOFC Cathode Materials by Means of Thin Film Model Electrodes”, 154, (9), (2007), B931
1073.15	800	223.872	0.00021929
1048.15	775	230	0.000121068				Additional Data Reference Citations
1023.15	750	234.2	8.0006e-05			1	Sogaard, J. Solid State Chemistry, “Oxygen Nonstoichiometry and Transport Properties of Strontium Substituted Lanthanum Ferrite”, 180, (2007), 1489
998.15	725	255	5.29744e-05			2	Ten Elshof, J. Electrochem. Soc., “Oxygen Exchange and Diffusion Coefficients of Strontium-Doped Lanthanum Ferrites by Electrical Conductivity Relaxation”, 144, (3), (1997), 1060
948.15	675	309	2.17688e-05
							NOTE
Ko							Kchem, Ko and Rs Value Colors Indicate the following:
Temperature (K)	Temperature (°C)	Co (mol*cm-3) From Additional Reference (1)	Ko (cm/s)				Yam, Green, Purple	Values were taken directly from this current citation without calculations
1073.15	800	0.0798319	9.79532e-07				Dark Grey	Values were derived within the primary citation or was calculated here using other parameters within the primary citation
1048.15	775	0.0816464	5.26383e-07				Light Grey	Values were calculated using parameters taken from other literature citations
1023.15	750	0.0795267	3.41614e-07
998.15	725	0.0774101	2.07743e-07
948.15	675	0.0731865	7.04492e-08
Rs
Temperature (K)	Temperature (°C)		Rs (Ω* cm2)
1073.15	800		3.06269
1048.15	775		5.4428
1023.15	750		8.40482
998.15	725		13.8519
948.15	675		41.04
Additional Reference Data from Primary Citation
Temperature (K)	Temperature (°C)	Rs (Ω* cm2)		Temperature (K)	Temperature (°C)	Ko (cm/s) From Additional Reference (2)	Co (mol*cm-3)
1273.15	1000	0.0307856		1073.15	800	8.85931e-06	0.00882663
1223.15	950	0.097227		1048.15	775	4.68858e-06	0.00916636
1173.15	900	0.307062		1023.15	750	3.01544e-06	0.00900943
1123.15	850	0.96976		998.15	725	2.46604e-06	0.00652114
1073.15	800	3.06269		948.15	675	7.30145e-07	0.00706151
1048.15	775	5.4428
1022.52	749.369	8.40482
1020.35	747.201	8.77801
1018.62	745.473	9.36911
1015.61	742.464	9.78512
1013.05	739.899	10.444
1010.93	737.778	10.9078
1007.96	734.808	11.1473
1005.85	732.704	11.8979
1003.75	730.604	12.6991
1001	727.851	13.263
998.762	725.612	13.8519
995.862	722.712	14.467
993.396	720.246	15.4411
990.54	717.39	16.4809
987.284	714.134	17.5907
984.863	711.713	18.3718
982.048	708.898	19.6089
978.85	705.7	20.9293
976.072	702.922	21.8586
973.702	700.552	23.3305
970.563	697.413	24.9016
967.829	694.679	26.5784
965.904	692.754	28.9911
963.18	690.03	29.6277
961.261	688.111	30.9433
959.417	686.267	33.0269
957.854	684.704	34.4934
955.566	682.416	35.2509
953.652	680.502	37.6246
952.136	678.986	39.2952
949.127	675.977	41.04
947.634	674.484	43.8036
945.77	672.62	45.7486
943.574	670.424	47.7799
941.708	668.558	49.9015
939.144	665.994	53.2617
936.944	663.794	55.6267
934.387	661.237	59.3724
931.498	658.348	62.0087
929.368	656.218	66.1843
926.87	653.72	69.123
924.693	651.543	73.7776
922.594	649.444	77.0535
920.81	647.66	82.2421
918.695	645.545	85.8939
916.943	643.793	89.7078
914.578	641.428	95.7485
911.743	638.593	102.196
909.339	636.189	109.078
906.585	633.435	113.921
904.568	631.418	121.592
902.201	629.051	126.991
900.171	627.021	135.542
897.787	624.637	144.67
895.496	622.346	154.411
892.857	619.707	161.268
891.504	618.354	175.907
889.205	616.055	183.718
886.918	613.768	191.875
884.643	611.493	204.796
882.613	609.463	218.586
880.282	607.132	233.305
877.963	604.813	249.016
875.657	602.507	265.784
873.362	600.212	277.585
823.15	550	962.268
773.15	500	3039.03
723.15	450	9597.84
673.15	400	30311.8

## Sheet: LSF,Tripkovic (Phys Chem)
Avagodros Number		Boltzmann Constant		Faraday Constant			Study Reference
6.022e+23	mol-1	1.38e-23	J*K-1	96485.3	C*mol-1		I
Kchem							Primary Citation
Temperature (K)	Temperature (°C)		Kchem (cm/s)				Tripkovic, Phys. Chem. Chem. Phys., “Passivation and Activation of LSF Thin Film Electrodes”, 22, (2020), 15418
867.378	594.228		5.89e-05
852.646	579.496		3.61e-05
826.788	553.638		2e-05
805.672	532.522		1.18e-05
783.699	510.549		7.25e-06
764.327	491.177		4.53e-06				NOTE
743.141	469.991		2.67e-06				Kchem, Ko and Rs Value Colors Indicate the following:
722.126	448.976		1.43e-06				Yam, Green, Purple	Values were taken directly from this current citation without calculations
701.341	428.191		7.63e-07				Dark Grey	Values were derived within the primary citation or was calculated here using other parameters within the primary citation
681.148	407.998		3.7e-07				Light Grey	Values were calculated using parameters taken from other literature citations
Ko
Temperature (K)	Temperature (°C)		Ko (cm/s)
867.378	594.228		1.09e-06
852.646	579.496		7.2e-07
826.788	553.638		3.56e-07
805.672	532.522		2.14e-07
783.699	510.549		1.06e-07
764.327	491.177		5.99e-08
743.141	469.991		3.26e-08
722.126	448.976		1.58e-08
701.341	428.191		8.29e-09
681.148	407.998		3.71e-09
Rs
Temperature (K)	Temperature (°C)		Rs (Ω* cm2)
867.378	594.228		5.32
852.646	579.496		8.37
826.788	553.638		12.3
805.672	532.522		22.1
783.699	510.549		37.1
764.327	491.177		56.5
743.141	469.991		98
722.126	448.976		181
701.341	428.191		358
681.148	407.998		778
Additional Reference Data from Primary Citation
Temperature (K)	Temperature (°C)	Oxygen Thermodynamic Factor		Temperature (K)	Temperature (°C)	Co (mol*cm-3)
867.378	594.228	54.0367		867.378	594.228	0.0333267
852.646	579.496	50.1389		852.646	579.496	0.0314766
826.788	553.638	56.1798		826.788	553.638	0.042086
805.672	532.522	55.1402		805.672	532.522	0.0379996
783.699	510.549	68.3962		783.699	510.549	0.0444427
764.327	491.177	75.626		764.327	491.177	0.0504568
743.141	469.991	81.9018		743.141	469.991	0.0519093
722.126	448.976	90.5063		722.126	448.976	0.056369
701.341	428.191	92.0386		701.341	428.191	0.0527549
681.148	407.998	99.7305		681.148	407.998	0.0526765

## Sheet: LSFC,Plonczak (Electrochem)
Avagodros Number		Boltzmann Constant		Faraday Constant			Study Reference
6.022e+23	mol-1	1.38e-23	J*K-1	96485.3	C*mol-1		J
Kchem							Primary Citation
Temperature (K)	Temperature (°C)		Kchem (cm/s)				Plonczak, J, Electrochem. Soc., “Electrochemical Characterization of LSFC Thin Film Electrodes Prepared by Pulsed Laser Deposition”, 159, (5), (2012), B471
1023.15	750		0.00011386
998.15	725		4.029e-05
973.15	700		1.96e-05
948.15	675		9.95e-06
923.15	650		3.969e-06
898.15	625		2.179e-06				NOTE
							Kchem, Ko and Rs Value Colors Indicate the following:
Ko							Yam, Green, Purple	Values were taken directly from this current citation without calculations
Temperature (K)	Temperature (°C)		Ko (cm/s)				Dark Grey	Values were derived within the primary citation or was calculated here using other parameters within the primary citation
1023.15	750		4.7748e-07				Light Grey	Values were calculated using parameters taken from other literature citations
998.15	725		1.6895e-07
973.15	700		7.3e-08
948.15	675		3.2829e-08
923.15	650		1.2582e-08
898.15	625		5.43698e-09
Rs
Temperature (K)	Temperature (°C)	Area Multiplication Factor (cm2)	Resistance (Ω)	Rs (Ω* cm2)
1023.15	750	0.39	30	11.7
998.15	725	0.39	65	25.35
973.15	700	0.39	150	58.5
948.15	675	0.39	180	70.2
923.15	650	0.39	600	234
898.15	625	0.39	1500	585
873.15	600	0.39	2700	1053
Additional Reference Data from Primary Citation
Temperature (K)	Temperature (°C)	Oxygen Thermodynamic Factor		Temperature (K)	Temperature (°C)	Co (mol*cm-3)
1123.15	850	184.485		1123.15	850	0.0453779
1098.15	825	200.586		1098.15	825	0.0786514
1073.15	800	218.655		1073.15	800	0.06
1048.15	775	239.006		1048.15	775	0.05
1023.15	750	238.46		1023.15	750	0.0408729
998.15	725	238.473		998.15	725	0.0520112
973.15	700	268.493		973.15	700	0.0508555
948.15	675	303.086		948.15	675	0.0918162
923.15	650	315.451		923.15	650	0.0699752
898.15	625	400.774		898.15	625	0.0630191
873.15	600	489.737		873.15	600	0.05
773.15	500	816.41

[truncated: 48 more sheets: LSFC,Bouwmeester (Solid State), LSFC,Cox-Galhotra (Solid State), LSFC,Dalslet (Electrochem), LSFC,Huang (Electrochem), LSFC,Lane (Electrochem), LSFC,Li (Electrochem), LSFC,Reid (Electrochem), LSFC,Wang (Solid State Ionics), LSFC,Armstrong (Phys Chem), LSFC,Chater (Solid State Ionics, LSFC,Steele (Solid State Ionics, LSFC,Baumann (Electrochem), LSFC,Simrick (Electrochem), LSC,Moreno (Electrochem), LSC,Berenov (Solid State Ionic), LSC,Egger (Solid State Ionics), LSC,Sogaard (Solid State Ionics, LSC,Baumann (Electrochem), LSC,Januschewsky (Adv Funct), LSC,Siebenhofer (Mater Chem) …]
